# Supplementary material
Source: PubMed Central journal article supplement (PMC3985447)
Supplement: ja4109352_si_001.pdf [file ja4109352_si_001.pdf]

## SUPPLEMENTAL INFORMATION

### The Transcriptional Complex Between the *BCL2* i-Motif and hnRNP LL Is a Molecular Switch for Control of Gene Expression that can be Modulated by Small Molecules

Hyun-Jin Kang,<sup>1†</sup> Samantha Kendrick,<sup>2†</sup> Sidney M. Hecht,<sup>4,5</sup> and Laurence H. Hurley<sup>1-3\*</sup>

<sup>1</sup>College of Pharmacy, University of Arizona, Tucson, Arizona 85721

<sup>2</sup>Arizona Cancer Center, University of Arizona, Tucson, Arizona 85724

<sup>3</sup>BIO5 Institute, University of Arizona, Tucson, Arizona 85721

<sup>4</sup>Center for BioEnergetics, Biodesign Institute, Arizona State University, Tempe, Arizona  
85287

<sup>5</sup>Department of Chemistry and Biochemistry, Arizona State University, Tempe, Arizona  
85287

<sup>†</sup>These authors both contributed equally to this paper

\*Address correspondence to this author

Telephone: (520) 626-5622

Fax: (520) 626-0035

E-mail: hurley@pharmacy.arizona.edu

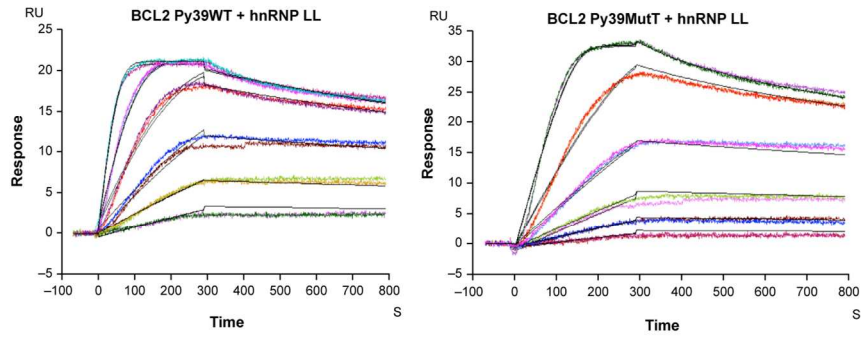

**Supplemental Figure 1.** SPR sensorgrams for binding of increasing concentrations of hnRNP LL to Py39WT (left) and Py39MutT (right). The pH of the sensorgram is 6.8.

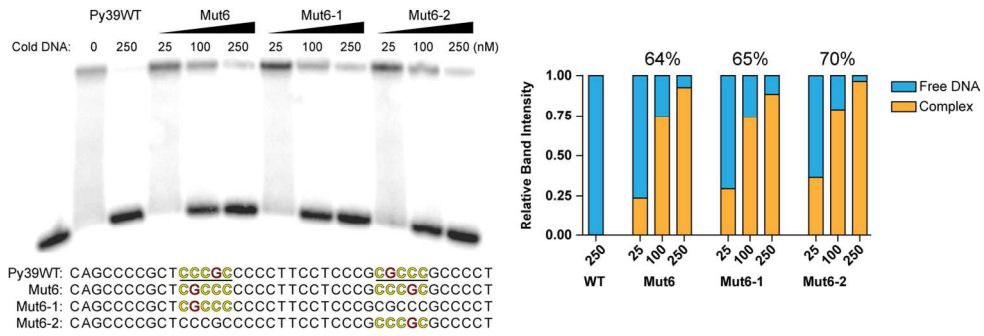

**Supplemental Figure 2.** Competition EMSA showing selective binding of hnRNP LL to the two lateral loops of Py39WT with an 8:5:7 loop folding pattern. Four different mutant sequences were used: Mut5',3'L has mutations in two lateral loops, and Mut5'L and Mut3'L have mutations in the 5' loop and 3' loop, respectively. MutCL has mutations in the central loop. The percentages above the sets of histograms for Mut5',3'L, Mut5'L, Mut3'L, and MutCL are the addition of free DNA (%) for each concentration of cold oligomers divided by three.

**A**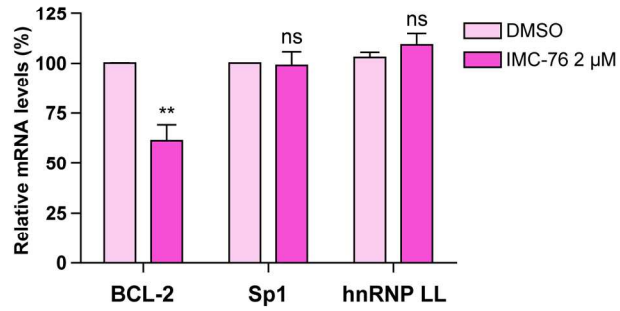**B**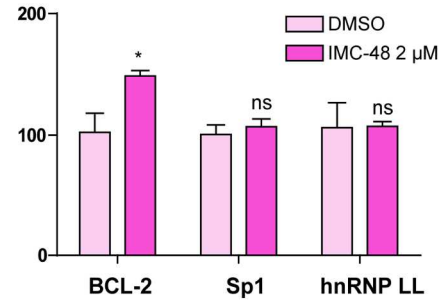

**Supplemental Figure 3.** Determination of the effect of IMC-76 and IMC-48 on the mRNA level of *SP1* and *hnRNP LL*. MCF-7 cells (A) and BJAB cells (B) were treated with DMSO and 2 μM of IMC-76 or IMC-48 for 24 h. The qPCR with gene-specific TaqMan probes were used to obtain  $C_t$  values for analysis (\*\*P < 0.01; \*P < 0.1; ns: not significant).

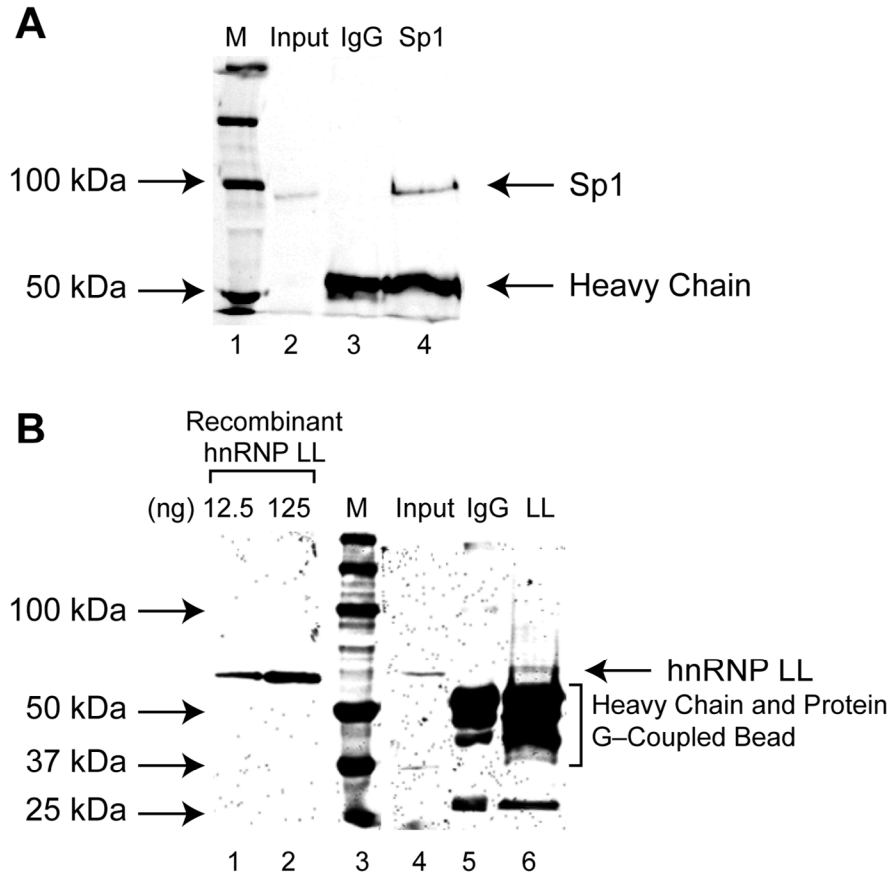

**Supplemental Figure 4.** Immunoprecipitation (IP) results for Sp1 (A) and hnRNP LL (B) to verify the antibody specificity with MCF-7 cells used for the ChIP assay. Polyclonal antibodies of Sp1 and hnRNP LL specifically captured Sp1 and hnRNP LL, respectively. (A) Nuclear extract (1  $\mu\text{g}/\mu\text{L}$ ) of MCF-7 cells for Sp1 (~90 kDa) were immunoprecipitated with Sp1 antibody. After IP, 6% SDS-PAGE and western blot were conducted to ascertain the IP result. (B) Because the endogenous level of hnRNP LL (61 kDa) was too low, less than 12.5 ng per 72.5  $\mu\text{g}$  (Input), whole cell lysate (12.5  $\mu\text{g}/\mu\text{L}$ ) for hnRNP LL was used for immunoprecipitation with the hnRNP LL antibody. As a negative control, IgG was used. After IP, 8% SDS-PAGE and western blot were conducted. Because the same antibodies were used for IPs and western blots, heavy and light chains were also detected.

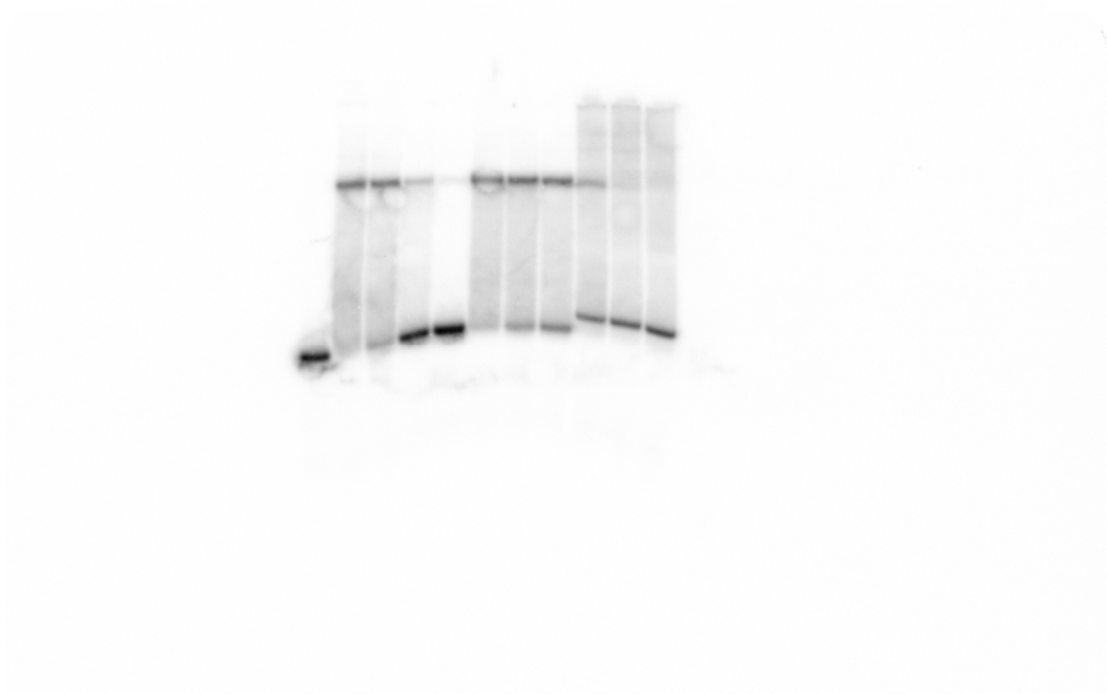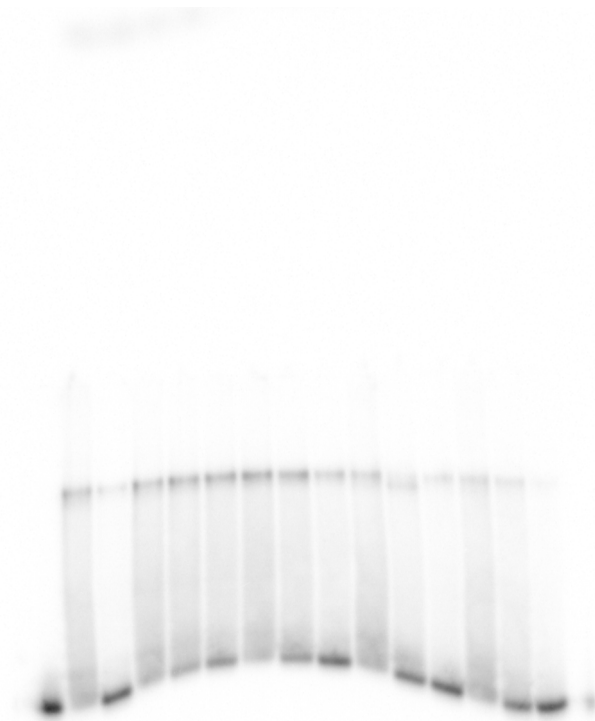

**Supplemental Figure 5.** Original, uncut gels for Figure 2C and Figure 3B.

**Supplemental Table 1.** Proteins purified using Py39WT *BCL2* i-motif biotinylated oligomer–streptavidin bead complex and identified by LC/MS/MS.

| <b>PROTEIN SYMBOL</b> | <b>PROTEIN IDENTIFICATION</b>                                           | <b>ACCESSION NUMBER</b> |
|-----------------------|-------------------------------------------------------------------------|-------------------------|
|                       | <b><i>Transcription-Related</i></b>                                     |                         |
| HMG-I                 | Isoform HMG-I of high-mobility group protein HMGI/HMG-Y                 | IPI00179700             |
| hnRNP UL2             | Heterogeneous nuclear ribonucleoprotein U-like protein 2                | IPI00456887             |
| hnRNP LL              | Isoform 1 of heterogeneous nuclear ribonucleoprotein L-like             | IPI00103247             |
| GEMIN5                | Gem-associated protein 5                                                | IPI00291783             |
| HDGF                  | Hepatoma-derived growth factor                                          | IPI00020956             |
| HMGN1                 | Nucleosome-binding protein 1                                            | IPI00006157             |
| DDX21                 | Isoform 1 of nucleolar RNA helicase 2                                   | IPI00015953             |
| RBBP4                 | Histone-binding protein RBBP4                                           | IPI00328319             |
| RBBP7                 | Histone-binding protein RBBP7                                           | IPI00395865             |
|                       |                                                                         |                         |
|                       | <b><i>Translation or Protein Folding-Related</i></b>                    |                         |
| eEF2                  | Elongation factor 2                                                     | IPI00186290             |
| eEF1G-like            | cDNA FLJ56389, highly similar to elongation factor 1-γ                  | IPI00000875             |
| EIF3A                 | Eukaryotic translation initiation factor 3 subunit A                    | IPI00029012             |
| CPSF5                 | Cleavage and polyadenylation specificity factor subunit 5               | IPI00646917             |
| HSPA5                 | Heat Shock A5 protein                                                   | IPI00003362             |
| HSP70-4               | Heat shock 70 kDa protein 4                                             | IPI00002966             |
|                       |                                                                         |                         |
|                       | <b><i>Energy Metabolism or other Enzymatic-Related</i></b>              |                         |
| GAPDH                 | Glyceraldehyde-3-phosphate dehydrogenase                                | IPI00219018             |
| SHMT                  | Isoform 1 of serine hydroxymethyltransferase, cytosolic                 | IPI00002519             |
| ALDOA                 | Fructose-bisphosphate aldolase A                                        | IPI00465439             |
| TrxR                  | Isoform 5 of thioredoxin reductase 1, cytoplasmic                       | IPI00554786             |
| NMT-1                 | Isoform short of glycylopeptide N-tetradecanoyltransferase 1            | IPI00218830             |
| ArgRS                 | Isoform complexed of arginyl-tRNA synthetase, cytoplasmic               | IPI00004860             |
| LARS                  | Leucyl-tRNA synthetase, cytoplasmic                                     | IPI00103994             |
| CKB                   | Creatine kinase B-type                                                  | IPI00022977             |
| TPI-2                 | Isoform 2 of triosephosphate isomerase                                  | IPI00451401             |
| DTD                   | D-tyrosyl-tRNA(Tyr) deacylase 1                                         | IPI00152692             |
| S100-A7               | Protein S100-A7                                                         | IPI00219806             |
| S100-A8               | Protein S100-A8                                                         | IPI00007047             |
| S100-A9               | Protein S100-A9                                                         | IPI00027462             |
|                       |                                                                         |                         |
|                       | <b><i>Cell Surface Adhesion, Migration, or Organization-Related</i></b> |                         |
| EZR                   | Ezrin                                                                   | IPI00843975             |
| CK5                   | Keratin, type II cytoskeletal 5                                         | IPI00009867             |
| CK14                  | Keratin, type I cytoskeletal 14                                         | IPI00384444             |

|        |                                   |             |
|--------|-----------------------------------|-------------|
| CaBP3  | Calreticulin                      | IPI00020599 |
| DERP12 | Dermal papilla-derived protein 12 | IPI00382990 |
| BUB3   | Mitotic checkpoint protein BUB3   | IPI00013468 |
| JUP    | Junction plakoglobin              | IPI00554711 |



**Supplemental Table 2.** Proteins purified using a Py39MutT *BCL2* i-motif biotinylated oligomer–streptavidin bead complex and identified by LC/MS/MS.

| <b>PROTEIN SYMBOL</b> | <b>PROTEIN IDENTIFICATION</b>                                           | <b>ACCESSION NUMBER</b> |
|-----------------------|-------------------------------------------------------------------------|-------------------------|
|                       | <b><i>Transcription-Related</i></b>                                     |                         |
| hnRNP K               | Isoform 1 heterogeneous nuclear ribonucleoprotein K                     | IPI00216049             |
| hnRNP D0              | Isoform 1 heterogeneous nuclear ribonucleoprotein D0                    | IPI00028888             |
| hnRNP C1/C2           | Isoform C1 heterogeneous nuclear ribonucleoproteins C1/C2               | IPI00216592             |
| HMGI-10               | High-mobility group protein 1-like 10                                   | IPI00018755             |
| FUSE                  | Isoform 1 of far upstream element-binding protein 1                     | IPI00375441             |
| PC4                   | Activated RNA polymerase II transcriptional coactivator p15             | IPI00221222             |
| NCL                   | Nucleolin protein                                                       | IPI00183526             |
| RECQ1                 | ATP-dependent DNA helicase Q1                                           | IPI00178431             |
|                       |                                                                         |                         |
|                       | <b><i>Translation or DNA Replication-Related</i></b>                    |                         |
| Pcpb1                 | Poly(rC)-binding protein 1                                              | IPI00016610             |
| Pcpb2b                | poly(rC) binding protein 2 isoform b                                    | IPI00012066             |
| SRSF3                 | Splicing factor, arginine/serine-rich 3                                 | IPI00010204             |
| NSEP1                 | Nuclease-sensitive element-binding protein 1                            | IPI00031812             |
| RPA                   | Replication protein A 70 kDa DNA-binding subunit                        | IPI00020127             |
| FEN1                  | Flap endonuclease 1                                                     | IPI00026215             |
|                       |                                                                         |                         |
|                       | <b><i>Energy Metabolism</i></b>                                         |                         |
| ENO1                  | Isoform $\alpha$ -enolase of $\alpha$ -enolase                          | IPI00465248             |
| PC                    | Pyruvate carboxylase, mitochondrial                                     | IPI00299402             |
|                       |                                                                         |                         |
|                       | <b><i>Cell Surface Adhesion, Migration, or Organization-Related</i></b> |                         |
| ALB                   | Putative uncharacterized protein ALB                                    | IPI00022434             |
| CK16                  | Keratin, type I cytoskeletal 16                                         | IPI00217963             |
| TUBB                  | Tubulin $\beta$ chain                                                   | IPI00011654             |
| TUBA1C                | Tubulin $\alpha$ -1C chain                                              | IPI00166768             |

**Supplemental Table 3.** Proteins purified that bound both the Py39WT and Py39MutT *BCL2* i-motif biotinylated oligomer–streptavidin bead complex and identified by LC/MS/MS.

| <b>PROTEIN SYMBOL</b> | <b>PROTEIN IDENTIFICATION</b>                                           | <b>ACCESSION NUMBER</b> |
|-----------------------|-------------------------------------------------------------------------|-------------------------|
|                       | <b><i>Transcription-Related</i></b>                                     |                         |
| NCL-like              | cDNA FLJ45706 fis, highly similar to Nucleolin                          | IPI00444262             |
| hnRNP A2/B1           | Putative uncharacterized protein HNRNPA2B1                              | IPI00386854             |
| hnRNP A1              | Isoform A1-B of heterogeneous nuclear ribonucleoprotein A1              | IPI00215965             |
| hnRNP R               | Heterogeneous nuclear ribonucleoprotein R                               | IPI00012074             |
| hnRNP G               | Heterogeneous nuclear ribonucleoprotein G                               | IPI00304692             |
| hnRNP A3              | Isoform 1 of heterogeneous nuclear ribonucleoprotein A3                 | IPI00419373             |
| FUS                   | Isoform short of RNA-binding protein FUS                                | IPI00221354             |
| NM23-H1               | Isoform 1 of nucleoside diphosphate kinase A                            | IPI00012048             |
| HMG-B2                | High-mobility group protein B2                                          | IPI00219097             |
| HMG-B3                | High-mobility group protein B3                                          | IPI00217477             |
| ILF-2                 | Interleukin enhancer-binding factor 2                                   | IPI00005198             |
| ILF-3                 | Isoform 5 interleukin enhancer-binding factor 3                         | IPI00219330             |
| ELAV-like             | cDNA FLJ60076, highly similar to ELAV-like protein 1                    | IPI00301936             |
|                       |                                                                         |                         |
|                       | <b><i>Translation or Protein Folding-Related</i></b>                    |                         |
| eEF1-A                | Elongation factor 1- $\alpha$                                           | IPI00025447             |
| DDBP1                 | DNA damage-binding protein 1                                            | IPI00293464             |
| DDBP2                 | Isoform 1 DNA damage-binding protein 2                                  | IPI00021518             |
| HSP70-1               | Heat shock 70 kDa protein 1                                             | IPI00304925             |
| HSC71                 | Isoform 1 of heat shock cognate 71 kDa protein                          | IPI00003865             |
| PPIase A              | Peptidyl-prolyl cis-trans isomerase A                                   | IPI00419585             |
| PPIase B              | Peptidyl-prolyl cis-trans isomerase B                                   | IPI00646304             |
| PDIA3                 | Protein disulfide-isomerase A3                                          | IPI00025252             |
| PDI                   | Protein disulfide-isomerase                                             | IPI00010796             |
| PA2G4                 | Proliferation-associated protein 2G4                                    | IPI00299000             |
| SDN1                  | Staphylococcal nuclease domain-containing protein 1                     | IPI00140420             |
|                       |                                                                         |                         |
|                       | <b><i>Energy and Purine Metabolism</i></b>                              |                         |
| PGK1                  | Phosphoglycerate kinase 1                                               | IPI00169383             |
| ACLY                  | ATP-citrate synthase                                                    | IPI00021290             |
| GPI                   | Glucose-6-phosphate isomerase                                           | IPI00027497             |
| PURH                  | Bifunctional purine biosynthesis protein PURH                           | IPI00289499             |
|                       |                                                                         |                         |
|                       | <b><i>Cell Surface Adhesion, Migration, or Organization-Related</i></b> |                         |
| RCC2                  | Regulator of chromosome condensation 2                                  | IPI00465044             |

|       |                                                   |             |
|-------|---------------------------------------------------|-------------|
| CK6B  | Keratin, type II cytoskeletal 6B                  | IPI00293665 |
| CK1   | Keratin, type II cytoskeletal 1                   | IPI00220327 |
| CK10  | Keratin, type I cytoskeletal 10                   | IPI00009865 |
| CK9   | Keratin, type I cytoskeletal 9                    | IPI00019359 |
| CK2   | Keratin, type II cytoskeletal 2 epidermal         | IPI00021304 |
| CLF-1 | Cofilin-1                                         | IPI00012011 |
| ACTA1 | Actin, cytoplasmic 1                              | IPI00021439 |
| FSCN1 | Fascin                                            | IPI00163187 |
|       | Isoform 2 of 4F2 cell-surface antigen heavy chain | IPI00027493 |
|       | 32 kDa protein                                    | IPI00176692 |
| RKIP  | Phosphatidylethanolamine-binding protein 1        | IPI00219446 |
